# Supplementary material for: Extraction of Se(iv) and Se(vi) from aqueous HCl solution by using a diamide-containing tertiary amine
Source: Royal Society of Chemistry journal article supplement (doi:10.1039/d3ra01341c), 2023-01-01
Supplement: d3ra01341c1.pdf [file d3ra01341c1.pdf]

## Supplementary data

### Extraction of Se(IV) and Se(VI) from aqueous HCl solution by using a diamide-containing tertiary amine

**Hirokazu Narita<sup>a,\*</sup>, Motoki Maeda<sup>b</sup>, Chiharu Tokoro<sup>b</sup>, Tomoya Suzuki<sup>a</sup>, Mikiya Tanaka<sup>c</sup>,  
Hideaki Shiwaku<sup>d</sup> and Tsuyoshi Yaita<sup>d</sup>**

<sup>a</sup> Global Zero Emission Research Center, National Institute of Advanced Industrial Science and Technology (AIST), 16-1 Onogawa, Tsukuba, Ibaraki 305-8569, Japan.

<sup>b</sup> School of Creative Science and Engineering, Waseda University, 3-4-1 Okubo, Shinjuku, Tokyo 169-8555, Japan.

<sup>c</sup> National Institute of Advanced Industrial Science and Technology (AIST), 1-1-1 Umezono, Tsukuba, Ibaraki 305-8560, Japan.

<sup>d</sup> Materials Science Research Center, Japan Atomic Energy Agency (JAEA), 1-1-1 Koto, Sayo, Hyogo 679-5148, Japan.

(\*Corresponding author: [hirokazu-narita@aist.go.jp](mailto:hirokazu-narita@aist.go.jp))

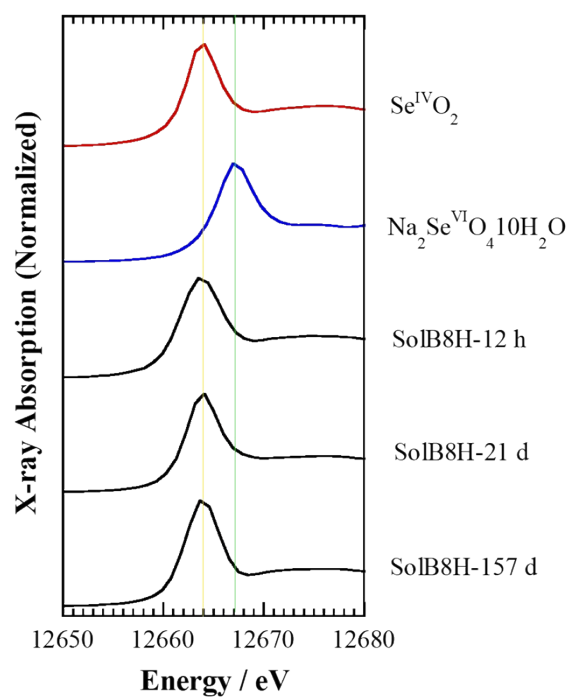

**Fig. S1** Effect of standing time (12 h, 21 d, or 157 d) on selenium K-edge XANES spectra obtained for **SolB8H**. **SolB8H** was obtained by dissolving  $\text{Na}_2\text{Se}^{\text{VI}}\text{O}_4 \cdot 10\text{H}_2\text{O}$  in 8 M HCl. The solution was then left to stand for the indicated times and then the selenium K-edge XANES spectrum was collected. The spectra for solid samples of  $\text{Se}^{\text{IV}}\text{O}_2$  and  $\text{Na}_2\text{Se}^{\text{VI}}\text{O}_4 \cdot 10\text{H}_2\text{O}$  are shown for comparison.

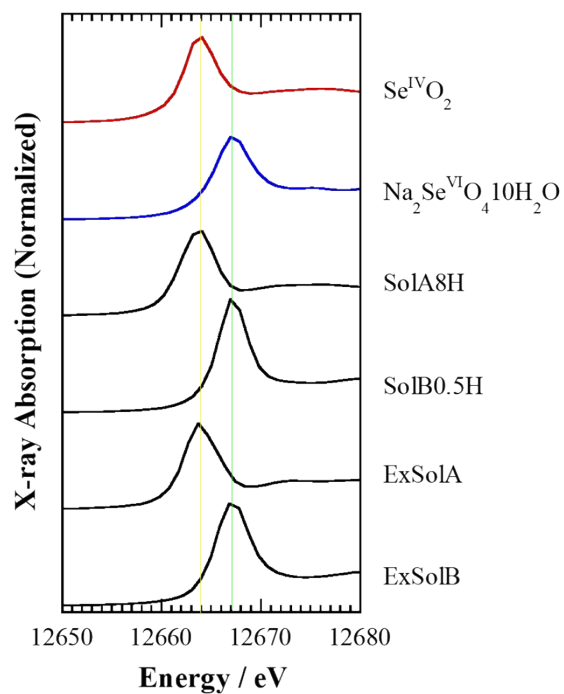

**Fig. S2** Se K-edge XANES spectra for the aqueous solutions **SolA8H** and **SolB0.5H**, the organic solutions **ExSolA** and **ExSolB**, and the reference solid ( $\text{Se}^{\text{IV}}\text{O}_2$  and  $\text{Na}_2\text{Se}^{\text{VI}}\text{O}_4 \cdot 10\text{H}_2\text{O}$ ).

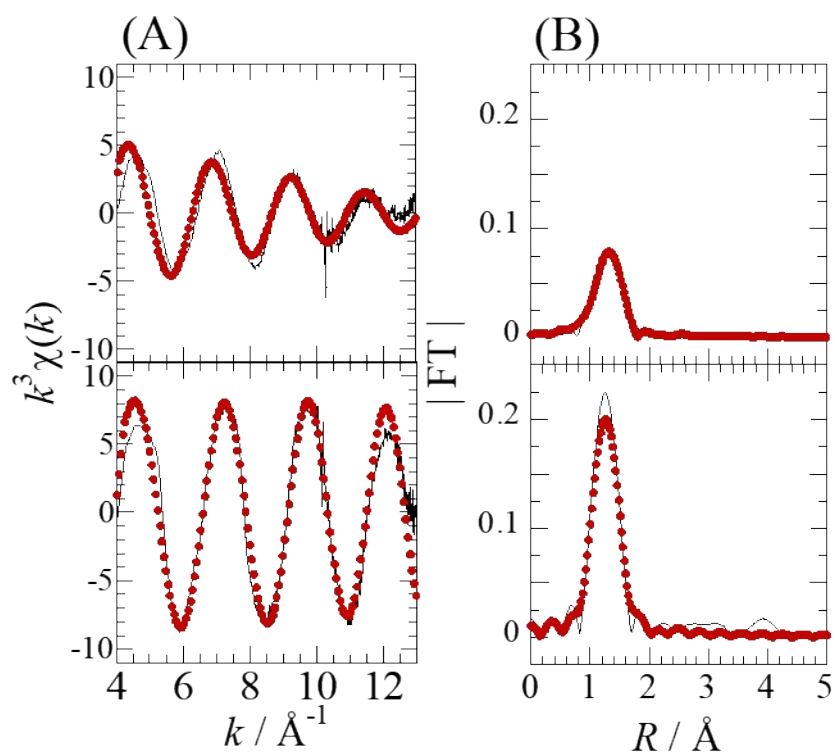

**Fig. S3** Se K-edge  $k^3$ -weighted EXAFS spectra (A) and the corresponding Fourier transforms (FT) (B) for the reference solid ( $\text{Se}^{\text{IV}}\text{O}_2$  (top) and  $\text{Na}_2\text{Se}^{\text{VI}}\text{O}_4 \cdot 10\text{H}_2\text{O}$  (bottom)). The phase shifts are not corrected. Experimental data (solid line) and theoretical fit (dotted line).

**Table S1** Curve-fitting results for selenium EXAFS data

|                                                      |      | $N$    | $r$ (Å)  | $\sigma^2$ (Å <sup>2</sup> ) | $\Delta E$ (eV) | R-factor |
|------------------------------------------------------|------|--------|----------|------------------------------|-----------------|----------|
| SeO <sub>2</sub>                                     | Se–O | 3.1(3) | 1.72(1)  | 0.005(1)                     | 9(1)            | 12       |
| Na <sub>2</sub> SeO <sub>4</sub> ·10H <sub>2</sub> O | Se–O | 4.0(4) | 1.645(1) | 0.0005(1)                    | 6(1)            | 8.1      |

The amplitude reduction factor,  $S_0^2$  was fixed at 0.86.  $N$ : Coordination number;  $r$ : Bond distance (Å);  $\sigma^2$ : Debye-Waller factor squared (Å<sup>2</sup>); <sup>d</sup>  $\Delta E$ : The shift in threshold energy(eV); R-factor =  $\Sigma|k^3\chi(k)_{\text{obs}} - k^3\chi(k)_{\text{calc}}| / \Sigma|k^3\chi(k)_{\text{obs}}| \times 100$ ; Estimated errors are shown in parentheses.
